# Supplementary material for: A Facile Approach for Fabrication of Core-Shell Magnetic Molecularly Imprinted Nanospheres towards Hypericin
Source: MDPI journal article supplement (doi:10.3390/polym9040135), 2017-04-07
Supplement: s1 [file s1]

# Supplementary Materials:

## A facile approach for fabrication of core-shell magnetic molecularly imprinted nanospheres toward hypericin

Wenxia Cheng, Fengfeng Fan, Ying Zhang, Zhichao Pei, Wenji Wang, and Yuxin Pei\*

Shanxi Key Laboratory of Natural Products & Chemical Biology, College of Chemistry & Pharmacy, Northwest A&F University, Yangling, Shaanxi, China;

E-mail: [peyx@nwfau.edu.cn](mailto:peyx@nwfau.edu.cn); Fax: +86-29-87092769; Tel: +86-29-87091196

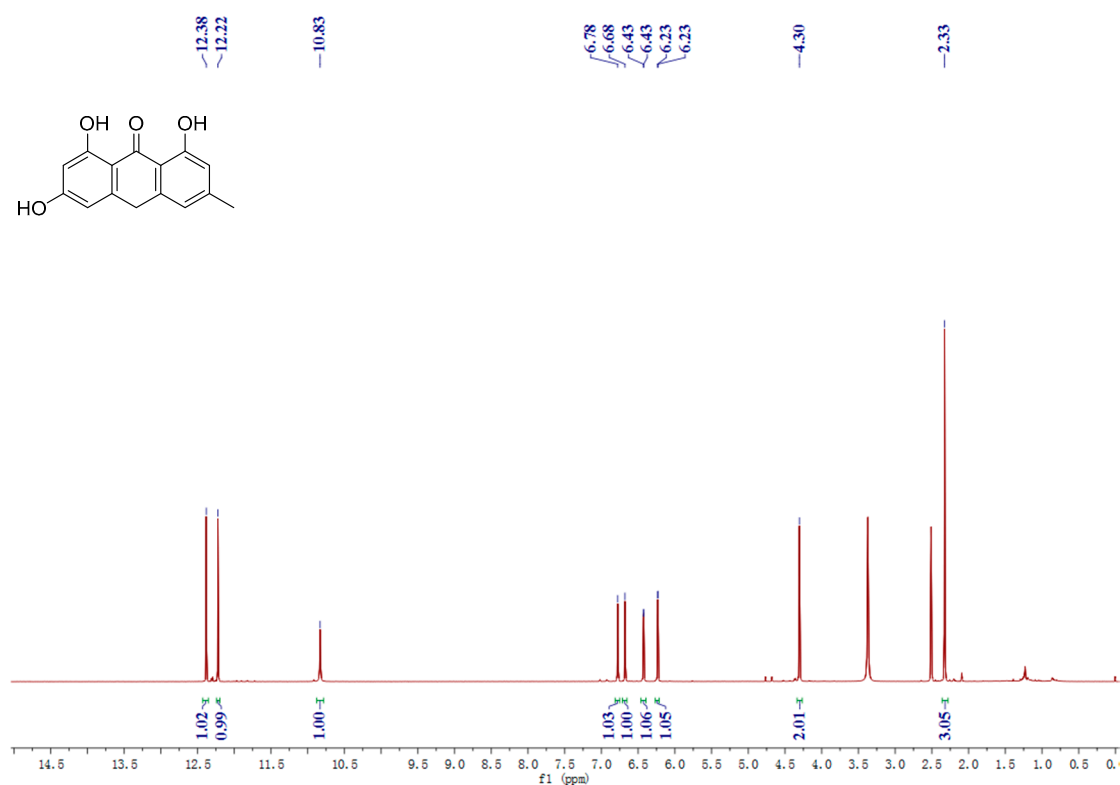

Figure S1. The <sup>1</sup>H-NMR spectrum of emodin anthrone.

**Emodin anthrone:** <sup>1</sup>H-NMR (500 MHz, DMSO-d<sub>6</sub>) δ 12.38 (s, 1H), 12.22 (s, 1H), 10.83 (s, 1H), 6.78 (s, 1H), 6.68 (s, 1H), 6.44 (d, J = 1.8 Hz, 1H), 6.24 (d, J = 2.1 Hz, 1H), 4.30 (s, 2H), 2.33 (s, 3H).

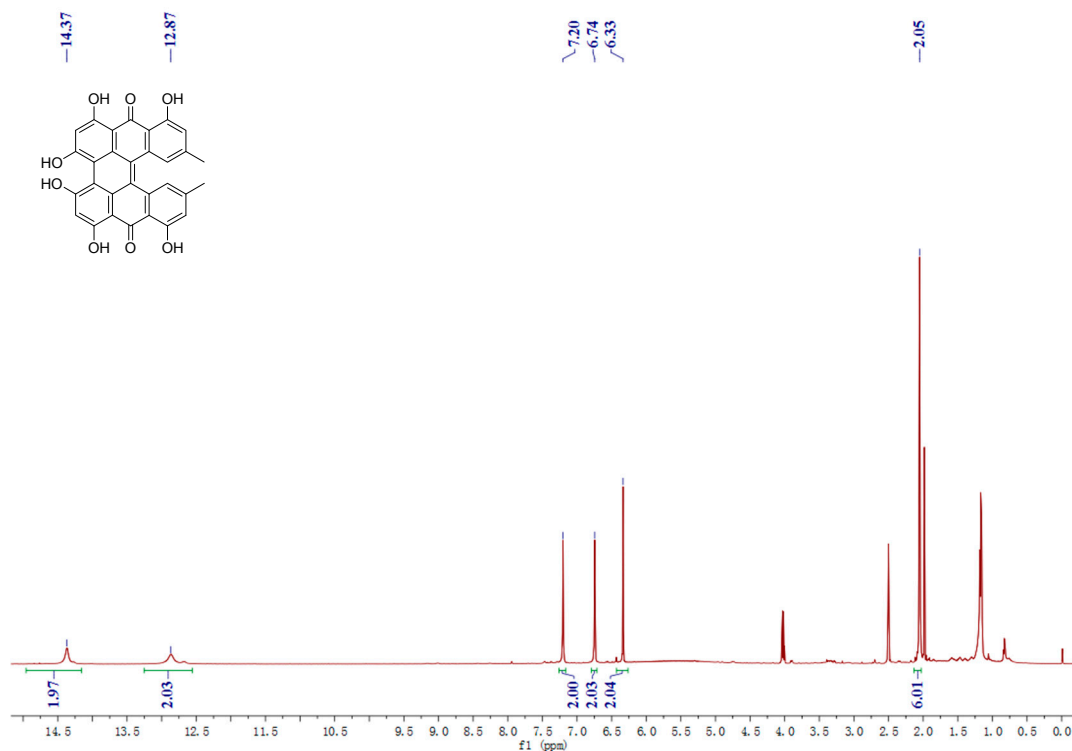

**Figure S2.** The <sup>1</sup>H-NMR spectrum of protohypericin.

**Protohypericin:** <sup>1</sup>H-NMR (500 MHz, DMSO-d<sub>6</sub>) δ 14.37 (s, 2H), 12.87 (s, 2H), 7.20 (s, 2H), 6.74 (s, 2H), 6.33 (s, 2H), 2.06 (s, 6H).

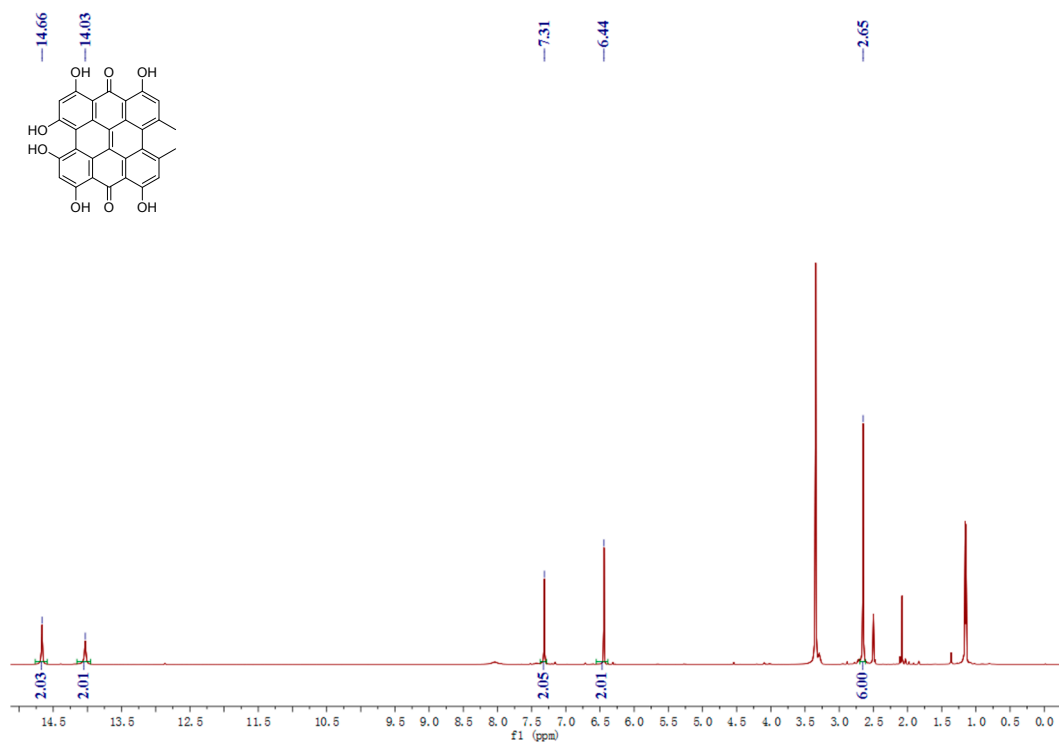

**Figure S3.** The <sup>1</sup>H-NMR spectrum of hypericin.

**Hypericin:** <sup>1</sup>H-NMR (500 MHz, CD<sub>3</sub>OD) δ 14.66 (s, 2H), 14.03 (s, 2H), 7.31 (s, 2H), 6.44 (s, 2H), 2.65 (s, 6H).

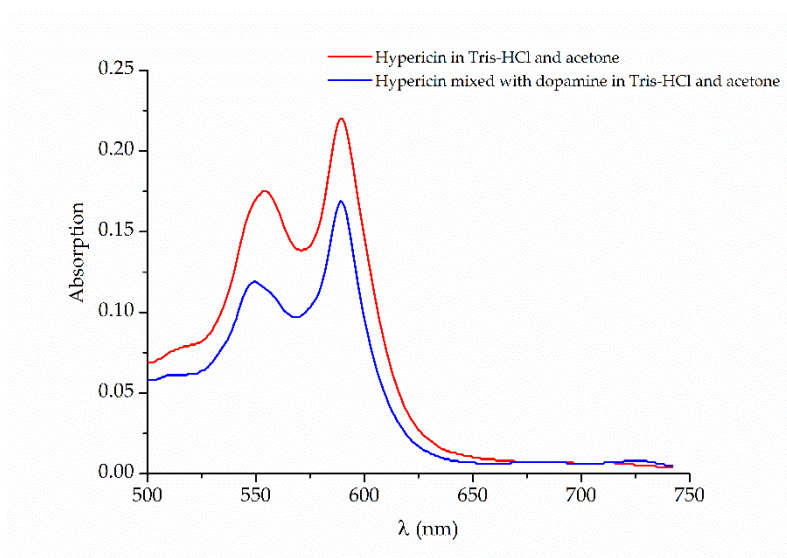

**Figure S4.** UV-Vis spectra of hypericin in Tris-HCl and acetone (v/v = 6:1, pH = 8.0) with (blue line), or without (red line) the presence of dopamine (2 mg/mL).

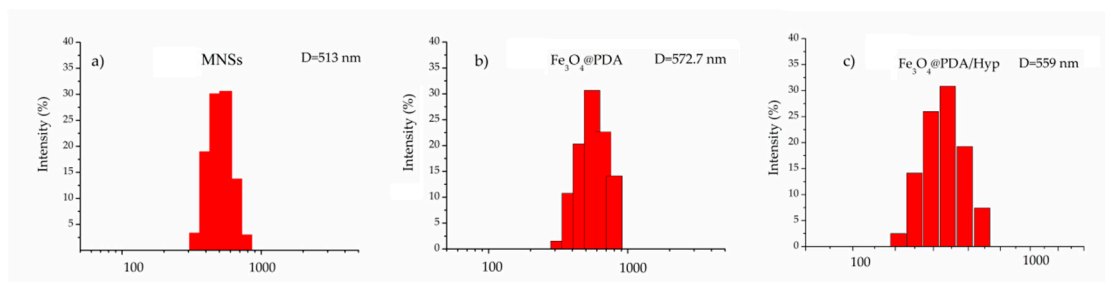

**Figure S5.** (a) DLS histogram of MNSs, PDI = 0.44; (b) DLS histogram of Fe<sub>3</sub>O<sub>4</sub>@PDA, PDI = 0.761; (c) DLS histogram of Fe<sub>3</sub>O<sub>4</sub>@PDA/Hyp, PDI = 0.385.

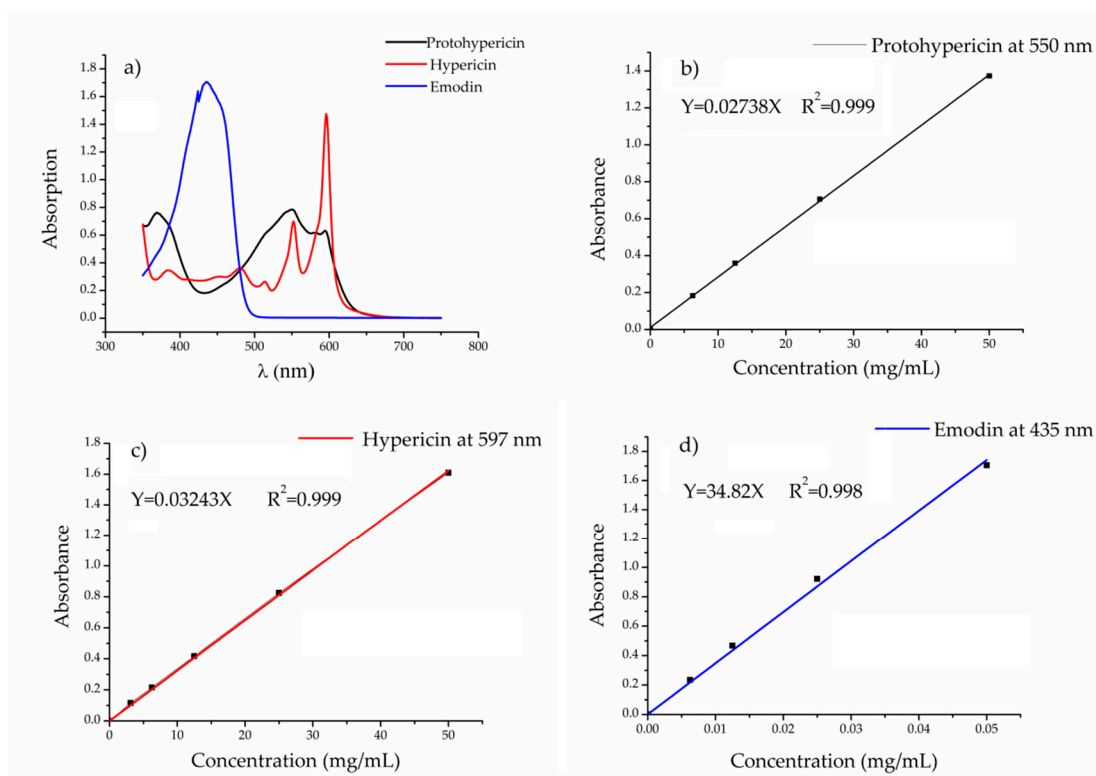

**Figure S6.** (a) UV-Vis spectra of hypericin, protohypericin, and emodin, respectively. (b) Standard curve of hypericin in acetone by UV-spectrophotometer at 597 nm. (c) Standard curve of protohypericin in acetone by UV-spectrophotometer at 550 nm. (d) Standard curve of emodin in acetone by UV-spectrophotometer at 435 nm.

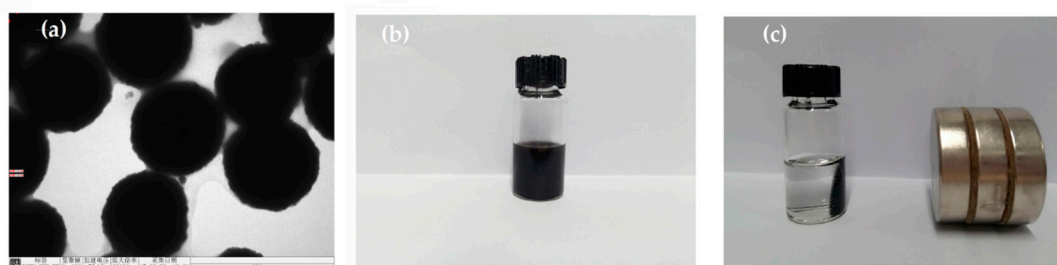

**Figure S7.** TEM images of MNSs (a) and their response to magnet in 10 s (b and c). Scale bar: 200 nm.

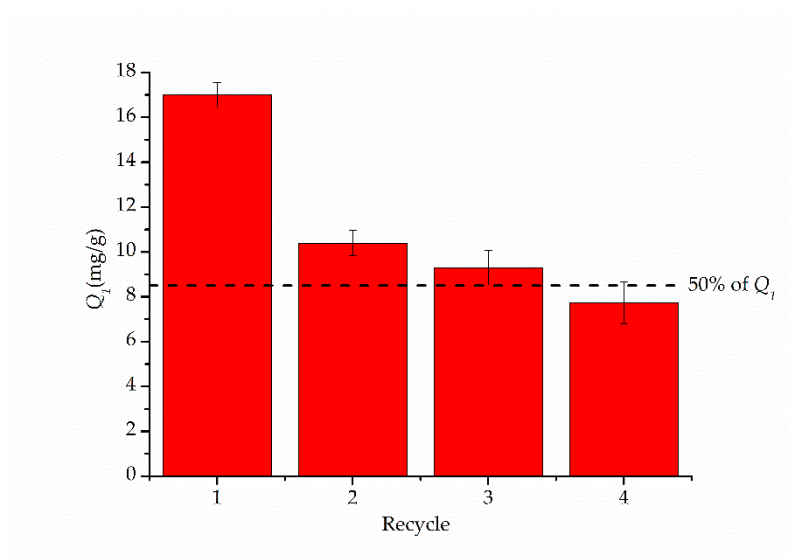

**Figure S8.** Reusability study of Fe<sub>3</sub>O<sub>4</sub>@PDA/Hyp NSs.
